# Supplementary material for: Determinants of overall knowledge of and attitudes towards HIV/AIDS transmission among ever-married women in Pakistan: evidence from the Demographic and Health Survey 2012–13
Source: PubMed Central journal article supplement (PMC6588857; doi:10.1186/s12889-019-7124-3), 2019-06-21
Supplement: 12889_2019_7124_MOESM1_ESM.pdf [file 12889_2019_7124_MOESM1_ESM.pdf]

**Table S3(a): Multivariate logistics regression of women's comprehensive HIV/AIDS knowledge with their SES and autonomy from PDHS 2012-2013 (excluding access to information from model)**

| Characteristics                                   | Women's comprehensive HIV/AIDS knowledge |           |         |
|---------------------------------------------------|------------------------------------------|-----------|---------|
|                                                   | Multivariate                             |           |         |
|                                                   | AOR                                      | CI (95%)  | p-value |
| <b>Regions/Provinces</b>                          |                                          |           |         |
| Punjab                                            | 1                                        |           |         |
| Sindh                                             | 1.54*                                    | 1.31-1.82 | <0.01   |
| Baluchistan                                       | 1.16                                     | 0.94-1.43 | 0.14    |
| Khyber Pakhtunkhwa                                | 3.51*                                    | 2.16-5.71 | <0.01   |
| Gilgit Baltistan                                  | 1.38                                     | 0.34-5.51 | 0.64    |
| Islamabad                                         | 1.59                                     | 0.74-3.41 | 0.23    |
| <b>Geographical classification</b>                |                                          |           |         |
| Rural                                             | 1                                        |           |         |
| Urban                                             | 1.04                                     | 0.89-1.21 | 0.58    |
| <b>Respondents age</b>                            |                                          |           |         |
| 15-24 years                                       | 1                                        |           |         |
| 25-34 years                                       | 1.31*                                    | 1.10-1.55 | <0.01   |
| 35 years and above                                | 1.24*                                    | 1.03-1.50 | 0.02    |
| <b>Respondents educational status</b>             |                                          |           |         |
| No formal schooling                               | 1                                        |           |         |
| Primary                                           | 1.15                                     | 0.96-1.38 | 0.11    |
| Secondary                                         | 1.58*                                    | 1.33-1.89 | <0.01   |
| Higher                                            | 2.63*                                    | 2.08-3.33 | <0.01   |
| <b>Husbands educational status</b>                |                                          |           |         |
| No formal schooling                               | 1                                        |           |         |
| Primary                                           | 1.01                                     | 0.81-1.24 | 0.96    |
| Secondary                                         | 1.06                                     | 0.89-1.27 | 0.48    |
| Higher                                            | 1.17                                     | 0.94-1.45 | 0.14    |
| <b>Respondents occupation</b>                     |                                          |           |         |
| Unemployed                                        | 1                                        |           |         |
| Professional/Managerial                           | 1.11                                     | 0.85-1.45 | 0.43    |
| Agriculture                                       | 1.22                                     | 0.90-1.66 | 0.19    |
| Unskilled workers                                 | 0.72                                     | 0.46-1.11 | 0.14    |
| <b>Wealth quintile</b>                            |                                          |           |         |
| Poorest                                           | 1                                        |           |         |
| Poorer                                            | 0.98                                     | 0.67-1.43 | 0.92    |
| Middle                                            | 1.00                                     | 0.69-1.43 | 0.99    |
| Richer                                            | 1.03                                     | 0.71-1.49 | 0.86    |
| Richest                                           | 1.70*                                    | 1.15-2.51 | 0.01    |
| <b>Respondents autonomy</b>                       |                                          |           |         |
| Low autonomy                                      | 1                                        |           |         |
| High autonomy                                     | 1.16*                                    | 1.02-1.33 | 0.02    |
| <b>Respondents attitudes towards wife beating</b> |                                          |           |         |
| Agree on wife beating                             | 1                                        |           |         |
| Disagree on wife beating                          | 0.84*                                    | 0.73-0.97 | 0.02    |

**Table S3(b): Multivariate logistics regression of women's comprehensive HIV/AIDS knowledge with their SES and autonomy from PDHS 2012-2013 (excluding wealth index from model)**

| Characteristics                                   | Women's comprehensive HIV/AIDS knowledge |           |         |
|---------------------------------------------------|------------------------------------------|-----------|---------|
|                                                   | Multivariate                             |           |         |
|                                                   | AOR                                      | CI (95%)  | p-value |
| <b>Regions/Provinces</b>                          |                                          |           |         |
| Punjab                                            | 1                                        |           |         |
| Sindh                                             | 1.53*                                    | 1.30-1.81 | <0.01   |
| Baluchistan                                       | 1.16                                     | 0.94-1.43 | 0.15    |
| Khyber Pakhtunkhwa                                | 3.39*                                    | 2.08-5.52 | <0.01   |
| Gilgit Baltistan                                  | 1.11                                     | 0.28-4.44 | 0.87    |
| Islamabad                                         | 1.76                                     | 0.82-3.76 | 0.14    |
| <b>Geographical classification</b>                |                                          |           |         |
| Rural                                             | 1                                        |           |         |
| Urban                                             | 1.24*                                    | 1.09-1.42 | <0.01   |
| <b>Respondents age</b>                            |                                          |           |         |
| 15-24 years                                       | 1                                        |           |         |
| 25-34 years                                       | 1.34*                                    | 1.13-1.59 | <0.01   |
| 35 years and above                                | 1.35*                                    | 1.12-1.63 | 0.01    |
| <b>Respondents educational status</b>             |                                          |           |         |
| No formal schooling                               | 1                                        |           |         |
| Primary                                           | 1.15                                     | 0.96-1.37 | 0.11    |
| Secondary                                         | 1.66*                                    | 1.40-1.97 | <0.01   |
| Higher                                            | 3.00*                                    | 2.38-3.77 | <0.01   |
| <b>Husbands educational status</b>                |                                          |           |         |
| No formal schooling                               | 1                                        |           |         |
| Primary                                           | 1.03                                     | 0.83-1.28 | 0.75    |
| Secondary                                         | 1.14                                     | 0.95-1.36 | 0.15    |
| Higher                                            | 1.33*                                    | 1.08-1.63 | 0.01    |
| <b>Respondents occupation</b>                     |                                          |           |         |
| Unemployed                                        | 1                                        |           |         |
| Professional/Managerial                           | 1.16                                     | 0.89-1.52 | 0.26    |
| Agriculture                                       | 1.21                                     | 0.89-1.64 | 0.21    |
| Unskilled workers                                 | 0.75                                     | 0.48-1.17 | 0.20    |
| <b>Exposure to mass media</b>                     |                                          |           |         |
| No                                                | 1                                        |           |         |
| Yes                                               | 1.30*                                    | 1.03-1.64 | 0.02    |
| <b>Respondents autonomy</b>                       |                                          |           |         |
| Low autonomy                                      | 1                                        |           |         |
| High autonomy                                     | 1.13                                     | 0.99-1.29 | 0.06    |
| <b>Respondents attitudes towards wife beating</b> |                                          |           |         |
| Agree on wife beating                             | 1                                        |           |         |
| Disagree on wife beating                          | 0.81*                                    | 0.70-0.94 | <0.01   |

**Table S4(a): Multivariate logistics regression of women's attitude towards PLWHAs with their SES and autonomy from PDHS 2012-2013 (excluding access to information from model)**

| Characteristics                                   | Women's attitude towards PLWHAs |           |             |
|---------------------------------------------------|---------------------------------|-----------|-------------|
|                                                   | AOR                             | CI (95%)  | p-value     |
| <b>Respondents age</b>                            |                                 |           |             |
| 15-24 years                                       | 1                               |           |             |
| 25-34 years                                       | 0.98                            | 0.84-1.15 | 0.80        |
| 35 years and above                                | 0.77*                           | 0.65-0.91 | <0.01       |
| <b>Respondents educational status</b>             |                                 |           |             |
| No formal schooling                               | 1                               |           |             |
| Primary                                           | 1.03                            | 0.87-1.22 | 0.71        |
| Secondary                                         | 1.27*                           | 1.08-1.49 | <0.01       |
| Higher                                            | 2.08*                           | 1.70-2.55 | <0.01       |
| <b>Husbands educational status</b>                |                                 |           |             |
| No formal schooling                               | 1                               |           |             |
| Primary                                           | 1.13                            | 0.83-1.28 | 0.23        |
| Secondary                                         | 1.18*                           | 0.95-1.36 | <b>0.05</b> |
| Higher                                            | 1.01                            | 1.08-1.63 | 0.90        |
| <b>Respondents occupation</b>                     |                                 |           |             |
| Unemployed                                        | 1                               |           |             |
| Professional/Managerial                           | 0.93                            | 0.73-1.19 | 0.57        |
| Agriculture                                       | 1.23                            | 0.93-1.63 | 0.15        |
| Unskilled workers                                 | 1.06                            | 0.69-1.61 | 0.79        |
| <b>Husbands occupation</b>                        |                                 |           |             |
| Unemployed                                        | 1                               |           |             |
| Professional/Managerial                           | 0.84                            | 0.58-1.23 | 0.37        |
| Agriculture                                       | 0.67                            | 0.45-1.01 | <b>0.05</b> |
| Unskilled workers                                 | 0.70                            | 0.48-1.02 | 0.06        |
| <b>Wealth quintile</b>                            |                                 |           |             |
| Poorest                                           | 1                               |           |             |
| Poorer                                            | 1.14                            | 0.79-1.64 | 0.47        |
| Middle                                            | 1.24                            | 0.88-1.75 | 0.21        |
| Richer                                            | 1.01                            | 0.71-1.42 | 0.96        |
| Richest                                           | 1.15                            | 0.81-1.64 | 0.43        |
| <b>Respondents attitudes towards wife beating</b> |                                 |           |             |
| Agree on wife beating                             | 1                               |           |             |
| Disagree on wife beating                          | 0.79*                           | 0.67-0.88 | <0.01       |

**Table S4(b): Multivariate logistics regression of women's attitude towards PLWHAs with their SES and autonomy from PDHS 2012-2013 (excluding wealth index from model)**

| Characteristics                                   | Women's attitude towards PLWHAs |           |                 |
|---------------------------------------------------|---------------------------------|-----------|-----------------|
|                                                   | Multivariate                    |           |                 |
|                                                   | AOR                             | CI (95%)  | p-value         |
| <b>Respondents age</b>                            |                                 |           |                 |
| 15-24 years                                       | 1                               |           |                 |
| 25-34 years                                       | 0.98                            | 0.84-1.15 | 0.84            |
| 35 years and above                                | 0.78*                           | 0.66-0.91 | <b>0.02</b>     |
| <b>Respondents educational status</b>             |                                 |           |                 |
| No formal schooling                               | 1                               |           |                 |
| Primary                                           | 1.01                            | 0.85-1.19 | 0.92            |
| Secondary                                         | 1.22*                           | 1.05-1.43 | <b>0.01</b>     |
| Higher                                            | 2.05*                           | 1.68-2.48 | <b>&lt;0.01</b> |
| <b>Husbands educational status</b>                |                                 |           |                 |
| No formal schooling                               | 1                               |           |                 |
| Primary                                           | 1.12                            | 0.92-1.37 | 0.25            |
| Secondary                                         | 1.17                            | 0.99-1.38 | <b>0.05</b>     |
| Higher                                            | 1.01                            | 0.84-1.23 | 0.90            |
| <b>Respondents occupation</b>                     |                                 |           |                 |
| Unemployed                                        | 1                               |           |                 |
| Professional/Managerial                           | 0.92                            | 0.72-1.17 | 0.50            |
| Agriculture                                       | 1.20                            | 0.91-1.59 | 0.19            |
| Unskilled workers                                 | 1.04                            | 0.69-1.58 | 0.83            |
| <b>Husbands occupation</b>                        |                                 |           |                 |
| Unemployed                                        | 1                               |           |                 |
| Professional/Managerial                           | 0.84                            | 0.58-1.22 | 0.36            |
| Agriculture                                       | 0.67*                           | 0.45-1.01 | <b>0.05</b>     |
| Unskilled workers                                 | 0.70                            | 0.48-1.02 | 0.06            |
| <b>Exposure to mass media</b>                     |                                 |           |                 |
| No                                                | 1                               |           |                 |
| Yes                                               | 1.23*                           | 0.99-1.53 | <b>0.05</b>     |
| <b>Respondents attitudes towards wife beating</b> |                                 |           |                 |
| Agree on wife beating                             | 1                               |           |                 |
| Disagree on wife beating                          | 0.78*                           | 0.68-0.89 | <b>&lt;0.01</b> |
